# Supplementary material for: The course of pain and function in osteoarthritis and timing of arthroplasty: the CHECK cohort
Source: PubMed Central journal article supplement (PMC6202767; doi:10.1080/17453674.2018.1502533), 2018-10-23
Supplement: IORT_A_1502533_SM4829.pdf [file IORT_A_1502533_SM4829.pdf]

## Supplementary data

Table 2. Baseline characteristics of our study population versus the baseline characteristics of the excluded patients/non-responders

|                                      | Current study population<br>n = 868 | Excluded patients/<br>non-responders<br>n = 134 | p-value |
|--------------------------------------|-------------------------------------|-------------------------------------------------|---------|
| Age                                  | 56 (5.2)                            | 56 (5.3)                                        | 0.6     |
| Sex:                                 |                                     |                                                 |         |
| Male                                 | 179 (21)                            | 31 (23)                                         |         |
| Female                               | 689 (79)                            | 103 (77)                                        | 0.5     |
| BMI                                  | 26 (4.1)                            | 26 (3.6)                                        | 0.3     |
| Comorbidities                        | 1.9 (1.5)                           | 1.9 (1.8)                                       | 0.7     |
| Number of painful joints:            |                                     |                                                 |         |
| 1                                    | 262 (30)                            | 46 (34)                                         |         |
| 2                                    | 370 (43)                            | 55 (41)                                         |         |
| 3                                    | 125 (14)                            | 19 (14)                                         |         |
| 4                                    | 111 (13)                            | 14 (10)                                         | 0.8     |
| Maximal Kellgren and Lawrence score: |                                     |                                                 |         |
| 0                                    | 302 (35)                            | 10 (8)                                          |         |
| 1                                    | 566 (65)                            | 10 (8)                                          | 0.2     |
| WOMAC subscales                      |                                     |                                                 |         |
| Pain                                 | 25 (17)                             | 29 (19)                                         | 0.01    |
| Function                             | 23 (17)                             | 27 (20)                                         | 0.01    |
| Stiffness                            | 33 (21)                             | 36 (23)                                         | 0.1     |

WOMAC; Western Ontario and McMaster Universities Osteoarthritis Index. Continuous variables are shown as mean (SD), categorical variables are shown as number (percentage)

Table 5. Sensitivity analyses

|                                                     | HR (95% CI)<br>adjusted for<br>maximal K&L<br>at baseline | HR (95% CI)<br>corrected for<br>maximal K&L<br>during follow-up |
|-----------------------------------------------------|-----------------------------------------------------------|-----------------------------------------------------------------|
| <b>Joint Model with slope included for pain</b>     |                                                           |                                                                 |
| Pain                                                | 1.08 (1.06–1.10)                                          | 1.07 (1.05–1.09)                                                |
| Pain slope                                          | 225 (0–276×10 <sup>6</sup> )                              | 2.46 (0–15×10 <sup>6</sup> )                                    |
| Sex <sup>a</sup>                                    | 0.60 (0.34–1.05)                                          | 0.68 (0.39–1.20)                                                |
| Age (years)                                         | 1.06 (1.01–1.10)                                          | 1.05 (1.01–1.10)                                                |
| BMI                                                 | 0.94 (0.89–0.99)                                          | 0.95 (0.90–1.00)                                                |
| Maximal K&L score                                   | 2.93 (1.53–5.61)                                          | 1.85 (1.38–2.47)                                                |
| Number of painful joints                            | 0.73 (0.57–0.93)                                          | 0.76 (0.60–0.98)                                                |
| Comorbidities                                       | 0.78 (0.67–0.92)                                          | 0.79 (0.67–0.93)                                                |
| <b>Joint Model with slope included for function</b> |                                                           |                                                                 |
| Function                                            | 1.06 (1.05–1.08)                                          | 1.06 (1.04–1.07)                                                |
| Function slope                                      | 1,801 (0–683×10 <sup>6</sup> )                            | 33.5 (0–52×10 <sup>6</sup> )                                    |
| Sex <sup>a</sup>                                    | 0.75 (0.43–1.30)                                          | 0.81 (0.46–1.40)                                                |
| Age (years)                                         | 1.05 (1.01: 1.10)                                         | 1.05 (1.00: 1.10)                                               |
| BMI                                                 | 0.95 (0.90–1.00)                                          | 0.95 (0.90–1.00)                                                |
| Maximal K&L score                                   | 2.95 (1.54–5.64)                                          | 1.85 (1.39–2.46)                                                |
| Number of painful joints                            | 0.73 (0.57–0.94)                                          | 0.78 (0.61–1.00)                                                |
| Comorbidities                                       | 0.81 (0.69–0.94)                                          | 0.82 (0.71–0.96)                                                |

HR: hazard ratio.

K&L: Kellgren and Lawrence

<sup>a</sup> Men as reference category

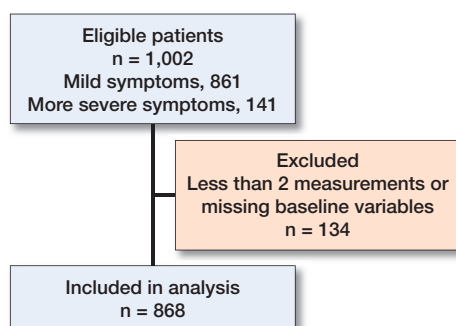

Figure 1. Flow chart.

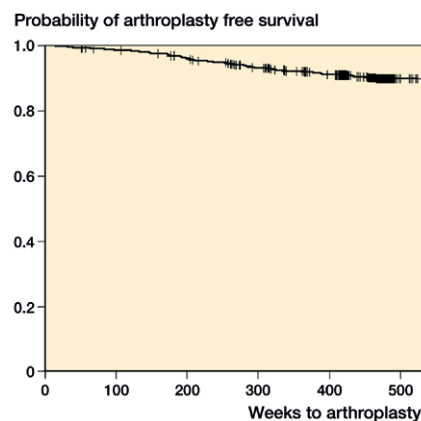

Figure 2. Kaplan–Meier curve for arthroplasty free survival. Censoring is symbolized by “+”.

**SUPPLEMENTARY FILE****R-code mixed effects model and joint model.****#Mixed model pain:**

```
fitlmeconv <- lme(womacpain~timetofollowup+gender+age+bmi+max_kl+painfulljoints+comorbidities, random=~timetofollowup |patientid,
data=d2, na.action=na.omit)
```

**#Mixed model function:**

```
fitlmeconv2 <- lme(womacfunction~timetofollowup +gender+age+bmi+max_kl+painfulljoints+comorbidities, random=~timetofollowup |patientid,
data=d2, na.action=na.omit)
```

**#Cox regression:**

```
coxFit <- coxph(Surv(timetoevent, arthroplasy) ~ gender + age +bmi+max_kl+painfulljoints+comorbidities, data = ds2, x = TRUE)
```

**#Joint Model pain:**

```
fit.JM <- jointModel(fitlmeconv, coxFit, timeVar="timetofollowup", method="piecewise-PH-aGH", verbose=TRUE)
summary(fit.JM)
confint(fit.JM, parm = "Event")
round(exp(confint(fit.JM, parm = "Event")), 2)
```

**#Joint Model pain + slope:**

```
dForm <- list(fixed = ~ 1,
             indFixed = 2,
             random = ~ 1,
             indRandom = 2)
fit.JM.slope <- jointModel(fitlmeconv, coxFit,
                          timeVar="timetofollowup",
                          method="piecewise-PH-aGH",
                          parameterization = "slope",
                          derivForm = dForm,
                          verbose=TRUE)
summary(fit.JM.slope)
```

```
fit.JM.both <- jointModel(fitlmeconv, coxFit,
                          timeVar="timetofollowup",
                          method="piecewise-PH-aGH",
                          parameterization = "both",
                          derivForm = dForm,
                          verbose=TRUE,
                          control = list(GHk = 9))
summary(fit.JM.both)
confint(fit.JM.both, parm = "Event")
round(exp(confint(fit.JM.both, parm = "Event")), 2)
```

**#Joint Model function:**

```
fit.JM2 <- jointModel(fitlmeconv2, coxFit, timeVar="timetofollowup", method="piecewise-PH-aGH", verbose=TRUE)
summary(fit.JM2)
confint(fit.JM2, parm = "Event")
round(exp(confint(fit.JM2, parm = "Event")), 2)
```

**#Joint Model function + slope:**

```
fit.JM.slope2 <- jointModel(fitlmeconv2, coxFit,
                           timeVar="timetofollowup",
                           method="piecewise-PH-aGH",
                           parameterization = "slope",
                           derivForm = dForm,
                           verbose=TRUE)
summary(fit.JM.slope2)
```

```
fit.JM.both2 <- jointModel(fitlmeconv2, coxFit,
                           timeVar="timetofollowup",
                           method="piecewise-PH-aGH",
                           parameterization = "both",
                           derivForm = dForm,
                           verbose=TRUE,
                           control = list(GHk = 9))
summary(fit.JM.both2)
confint(fit.JM.both2, parm = "Event")
round(exp(confint(fit.JM.both2, parm = "Event")), 2)
```
